# 1 Substrate Transport and Specificity 2 in a Phospholipid Flippase

3 **Yong Wang<sup>1,2\*</sup>, Joseph A Lyons<sup>3</sup>, Milena Timcenko<sup>3</sup>, Felix Kümmerer<sup>1</sup>, Bert L. de  
4 Groot<sup>4</sup>, Poul Nissen<sup>3</sup>, Vytautas Gapsys<sup>4</sup>, Kresten Lindorff-Larsen<sup>1\*</sup>**

**\*For correspondence:**

[yongwang\\_isb@zju.edu.cn](mailto:yongwang_isb@zju.edu.cn) (YW);  
[lindorff@bio.ku.dk](mailto:lindorff@bio.ku.dk) (KL-L)

5 <sup>1</sup>Structural Biology and NMR Laboratory & Linderstrøm-Lang Centre for Protein Science,  
6 Department of Biology, University of Copenhagen, Denmark; <sup>2</sup>Shanghai Institute for  
7 Advanced Study, Institute of Quantitative Biology, College of Life Sciences, Zhejiang  
8 University, Hangzhou 310027, China; <sup>3</sup>Danish Research Institute of Translational  
9 Neuroscience - DANDRITE, Nordic EMBL Partnership for Molecular Medicine, Dept.  
10 Molecular Biology and Genetics, Aarhus University, Aarhus, Denmark; <sup>4</sup>Computational  
11 Biomolecular Dynamics Group, Department of Theoretical and Computational  
12 Biophysics, Max Planck Institute for Biophysical Chemistry, D-37077 Göttingen,  
13 Germany

---

14  
15 **Abstract** Type 4 P-type ATPases are lipid flippases which help maintain asymmetric  
16 phospholipid distribution in eukaryotic membranes by driving unidirectional translocation of  
17 phospholipid substrates. Recent cryo-EM and crystal structures have provided a detailed view of  
18 flippases, and we here use molecular dynamics simulations to study the first steps of  
19 phospholipid transport and lipid substrate specificity. Our simulations and new cryo-EM  
20 structure shows phospholipid binding to a groove and subsequent movement towards the centre  
21 of the membrane, and reveal a preference for phosphatidylserine lipids. We find that only the  
22 lipid head group stays in the groove while the lipid tails remain in the membrane, thus visualizing  
23 how flippases have evolved to transport large substrates. The flippase also induces deformation  
24 and thinning of the outer leaflet facilitating lipid recruitment. Our simulations provide insight into  
25 substrate binding to flippases and suggest that multiple sites and steps in the functional cycle  
26 contribute to substrate selectivity.

---

## 28 Introduction

29 Eukaryotic cells separate the inside of the cell from the external environment by a complex mixture  
30 of phospholipids (PLs), proteins and other molecules which together form a ~4 nm thick bilayer  
31 (*Kobayashi and Menon, 2018*). The outer and inner leaflets of plasma membranes have different  
32 lipid composition, saturation and packing (*Kobayashi and Menon, 2018; Levental et al., 2020*), so  
33 that e.g. phosphatidylserine (PS) and phosphatidylethanolamine (PE) are enriched in the inner  
34 (cytosolic) leaflet, while phosphatidylcholine (PC) and sphingomyelin are found more often in the  
35 outer (exoplasmic) leaflet. The maintenance or modulation of the asymmetric PL distribution can  
36 play a central role in the proper functioning of the cell; for example, an increase in the population of  
37 PS in the outer leaflet of the plasma membrane serves as an 'eat-me' signal to induce phagocytosis  
38 (*Fadok et al., 1992*), whereas a decrease of the population of the negatively charged PS on the inner  
39 leaflet may result in a release of proteins with positively charged residues from the membrane to  
40 the cytosol by an 'electrostatic switch' mechanism (*Lipp et al., 2019*).

41 It is kinetically unfavourable for PLs to 'flip' (move from the outside to inside) and 'flop' (inside to

42 outside), and it requires energy to maintain asymmetric lipid distributions. Therefore, cells contain  
43 a number of different PL transporters that fall into three broad categories: scramblases, floppases,  
44 and flippases (*Montigny et al., 2016*). Scramblases (such as TMEM16 (*Falzone et al., 2018*) and a  
45 number of G-protein coupled receptors (*Menon et al., 2011*)) facilitate the movement of PLs in both  
46 directions without energy consumption. In contrast, flippases and floppases are unidirectional and  
47 ATP-dependent. They use the energy from ATP hydrolysis to flip or flop specific PLs against their  
48 concentration gradient. Indeed, PL flip/flop in the presence of ATP-dependent flippases/floppases  
49 typically occurs at the time scale of ~10-100 ms, much faster than that of the spontaneous process  
50 which is typically several hours or longer (*Kobayashi and Menon, 2018*).

51 The type 4 (P4) subgroup of the P-type ATPase superfamily are lipid flippases, that are re-  
52 lated to other well-characterized P-type ATPases including the Na<sup>+</sup>/K<sup>+</sup>-ATPase (NKA) and sarco-  
53 endoplasmic reticulum Ca<sup>2+</sup>-ATPase (SERCA) of the type II subgroup (*Palmgren and Nissen, 2011*;  
54 *Andersen et al., 2016*). NKA maintains the electrochemical gradients for Na<sup>+</sup> and K<sup>+</sup> (*Toyoshima*  
55 *et al., 2011*), while SERCA actively pumps Ca<sup>2+</sup> from the cytosol into internal stores (*Carafoli, 2002*).  
56 P-type ATPases are predicted to share a common core topology of cytosolic A (actuator), P (phos-  
57 phosphorylation), and N (nucleotide binding) domains, which confer the ATPase functionality, and a  
58 transmembrane (TM) domain (*Palmgren and Nissen, 2011*).

59 Transport by P-type ATPases generally follows the so-called Post-Albers cycle (*Albers, 1967*;  
60 *Post et al., 1972*), which has been structurally described by a wealth of crystal structures of SERCA  
61 and NKA (*Dyla et al., 2020*). The cycle transitions between two main functional states (E1 and E2)  
62 and their phosphorylated forms (termed E1P and E2P) (Fig. 1). During each cycle, inward- and/or  
63 outward-transport is controlled by opening and closing of cytoplasmic and exoplasmic pathways,  
64 which give access to the transmembrane binding sites with distinct affinities and specificities for  
65 the transported substrates. The transport of lipids by P4-ATPases is associated with the dephos-  
66 phosphorylation reaction, i.e., the E2P to E2/E1 transition (*Lyons et al., 2020*). Given the fact that PLs  
67 are typically ~10-fold larger than the cations transported by the P2 ATPases, the question, also  
68 referred to as the 'giant substrate problem' (*Baldrige and Graham, 2012*), arises as to how P4  
69 ATPases could use the same 'alternating-access' mechanism to transport large PLs.

70 The first structural insights into P4 flippase function were recently provided by the cryogenic  
71 electron microscopy (cryo-EM) structure of a key functional E2P state of the yeast Drs2p P4-ATPase  
72 (*Timcenko et al., 2019*). Similar structures of Drs2p and structures of other flippases, including  
73 mammalian ATP8A1, ATP11C and yeast Neo1p, Dnf1p and Dnf2p have been also subsequently de-  
74 termined (*Bai et al., 2019*; *Hiraizumi et al., 2019*; *Nakanishi et al., 2020a,b*; *He et al., 2020*; *Bai et al.,*  
75 *2020, 2021*; *Timcenko et al., 2021*). Drs2p is found in the trans-Golgi network membrane, where it  
76 acts as a PS lipid flippase, but has also been shown to transport PE to a lesser extent (*Natarajan*  
77 *et al., 2004*; *Azouaoui et al., 2014*). Like Drs2p, ATP8A1 and ATP11C also preferentially transport PS  
78 and PE, whereas Dnf1p and Dnf2p prefer PE, PC and their lyso-forms, as well as monosaccharide  
79 glycosphingolipids (like glucosylceramide and galactosylceramide) (*Baldrige and Graham, 2012*;  
80 *Takatsu et al., 2014*; *Lee et al., 2015*; *Roland et al., 2019*). The published structures provide molec-  
81 ular details on the transport cycle and lipid translocation, revealing putative binding locations on  
82 the protein surface for substrate entry (Fig. 1). These stabilized structures, however, do not directly  
83 reveal the process by which lipids are recognized and transported, and detailed analysis is further  
84 hampered by the lack of clear density and unambiguous assignment for the substrates in most of  
85 the structures.

86 Prior to the determination of atomic structures, a few models had been proposed to describe  
87 the mechanism of substrate selectivity. The 'credit card' model, inspired by scramblases (*Pomorski*  
88 *and Menon, 2006*; *Morra et al., 2018*), proposes a peripheral pathway that allows for lipid translo-  
89 cation. Here, the lipid flippase recognises and occludes the lipid head group while the hydrophobic  
90 tails remain in the membrane. Consistent with the credit card hypotheses, three transport models  
91 identifying different lipid entry sites on the protein surface have been proposed, namely the two  
92 gate, hydrophobic gate and central cavity models. The 'two-gate' model proposed the presence of

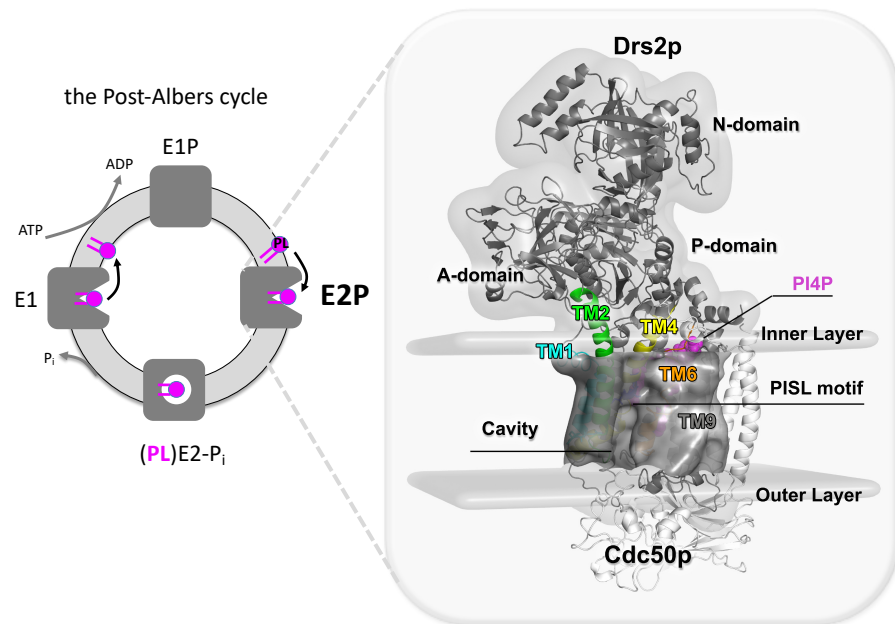

**Figure 1. The general (Post-Albers) conformational cycle of flippases and the cryo-EM structure of PI4P-activated E2P state of Drs2p in complex with Cdc50p.** The left panel shows a simplified Post-Albers transport cycle for P4-ATPases, in which repeating conformational changes occur between a few key functional states: the ‘inward-open’ E1, the phosphorylated E1P, the ‘outward-open’/occluded E2 and E2P. The yeast lipid flippase Drs2p has an architecture similar to that of other P-type ATPases, consisting of an actuator (A) domain, a nucleotide-binding (N) domain, a phosphorylation (P) domain, and a transmembrane domain of ten transmembrane helices (TMs). Drs2p functions in the presence of an auxiliary subunit, Cdc50p, which may play a role as a chaperone via an unknown mechanism. The Drs2p-Cdc50p complex alone is in an inactive form autoinhibited by the C-terminal tail of Drs2p (not shown in the cycle), but is activated by the binding of lipid phosphatidylinositol-4-phosphate (PI4P). The right panel shows the cryo-EM structure of the Drs2p in complex with Cdc50p (white cartoon) in the PI4P-activated E2P state (PDB entry: 6ROJ) (Timcenko *et al.*, 2019).

93 an entry gate where the PL is initially selected from the outer leaflet by the residues clustering at  
 94 an entry site defined between TM1, TM3 and TM4 and an exit gate on the inner leaflet side of the  
 95 membrane for further substrate selection (Baldrige and Graham, 2013). The ‘hydrophobic gate’  
 96 model derived from mutagenesis of bATP8A2 and a homology model based on SERCA, suggested  
 97 that a ring of hydrophobic residues centred around the highly conserved residues in the unwound  
 98 section of TM4 (PISL in the case of Drs2p) separates two proposed water-filled cavities that facilitate  
 99 lipid transport via a pathway defined by TM1, TM2, TM4 and TM6 (Vestergaard *et al.*, 2014). The  
 100 ‘central cavity’ model based on mutagenesis data and homology modeling proposed that a large  
 101 and deep cavity formed in the center of the TM domain bordered by TM3, TM4, and TM5 could po-  
 102 tentially accommodate the PL headgroup during transporting across the membranes analogous  
 103 to the ion transport mechanism in SERCA and NKA (Jensen *et al.*, 2017). These models alone, how-  
 104 ever, do not explain all of the biochemical data (Andersen *et al.*, 2016; Roland and Graham, 2016;  
 105 Palmgren *et al.*, 2019). The recent substrate-bound flippase structures are more consistent with  
 106 the ‘hydrophobic gate’ model. The structural determinants of lipid specificity and recognition, how-  
 107 ever, remain elusive.

108 Here, we use MD simulations in both atomic and near-atomic detail to explore the initial lipid  
 109 binding process in the outward-open E2P state and investigate the substrate selectivity using al-  
 110 chemical free energy calculations. We also present the cryo-EM structure of a substrate-bound E2P  
 111 state of Drs2p and perform atomistic MD simulations of this state, that together reveals specific  
 112 interactions between the lipid head group and the flippase. Our results reveal a preference for PS  
 113 binding to a water-filled substrate-binding groove, even in the outward open conformation, and

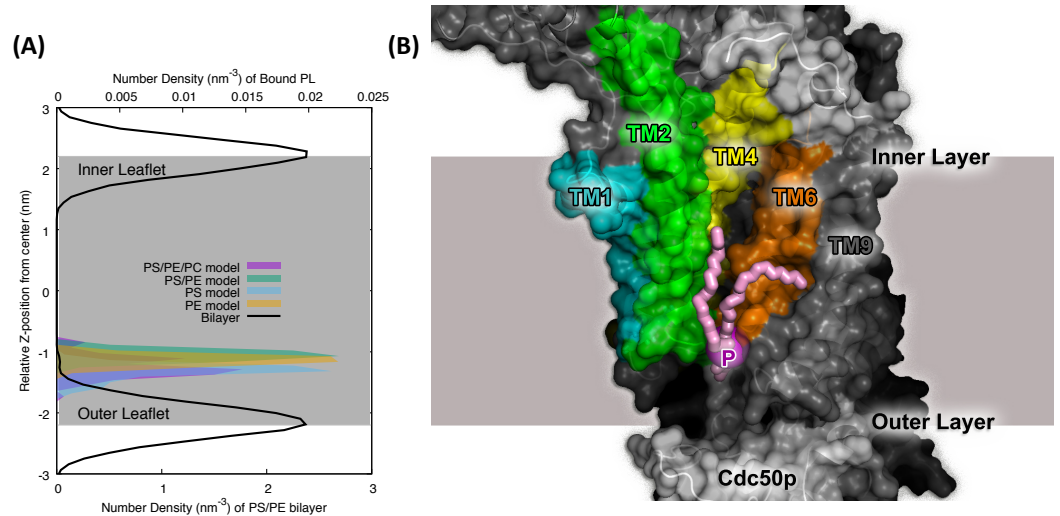

**Figure 2. Initial phospholipid binding to Drs2p observed in atomistic simulations.** (A) The average density maps of the phosphate headgroup of the bound PLs along the Z axis relative to the membrane center ( $z=0$ ) obtained from the last 100 ns of the atomistic simulations with different outer leaflet models. The density profile of the lipid bilayer (black line) is shown for comparison. (B) The representative lipid bound conformation, shown using a snapshot from an atomistic simulation of the pure POPS outer leaflet model (AA1; see also Table 1). TM1, TM2, TM4, TM6 are colored in cyan, green, yellow, and orange, respectively. The phosphorus atom of the bound PL is represented by a magenta sphere and the acyl chains are represented by pink sticks. The membrane bilayer is shown as a grey background.

114 local deformations and thinning of the lipid bilayer around Drs2p.

## 115 Results

### 116 Phospholipid binding to the TM2-TM4-TM6 groove of Drs2p

117 We used a combination of all-atom and coarse-grained (CG) MD simulations to investigate the lipid  
118 binding preferences of Drs2p, and how these depend on the lipid composition and membrane envi-  
119 ronment. Thus, we inserted the EM structure of the PI4P-activated E2P state of the Drs2p-Cdc50p  
120 complex into a series of simplified lipid bilayer models consisting of POPS (1-palmitoyl-2-oleoyl-  
121 sn-glycero-3-phosphoserine), POPE (1-palmitoyl-2-oleoyl-sn-glycero-3-phosphoethanolamine) and  
122 POPC (1-palmitoyl-2-oleoyl-sn-glycero-3-phosphocholine). The bilayers are asymmetric and have  
123 POPE and POPS in the inner leaflet at a 2:1 ratio, and POPS, POPE and POPC in the outer leaflet  
124 at different ratios. To mimic a biologically more realistic membrane similar to that found in yeast  
125 (Daum *et al.*, 1999), we also inserted the system in a bilayer consisting of seven different lipid types:  
126 POPS, POPE, POPC, POPA (phosphatidic acid), POPI (phosphatidylinositol), POPG (phosphatidylglyc-  
127 erol) and ERG (ergosterol) at a 2:10:15:2:10:1:10 ratio. All together we simulated the behaviour of  
128 Drs2p in six atomistic and eight CG models (Table 1; Materials and Methods).

129 In the atomistic simulations, we observed rapid (within tens of nanoseconds) binding of lipids  
130 to the entry of a groove formed between TM2, TM4 and TM6 (Fig. 2A and B). We observed that  
131 the phosphate headgroup of the bound lipids moved  $\sim 0.7$ -1.0 nm inside the membrane (Fig. 2A),  
132 and found that all three lipids (POPS, POPE and POPC) could bind to a similar location in different  
133 outer leaflet models. In our simulations of the yeast-like membrane model, we did not observe any  
134 substantial differences in the behaviour of protein and other related properties (such as the mem-  
135 brane deformation, water cavities, etc.) as compared with the simulations in the PS/PE/PC models.  
136 Therefore, to facilitate the investigations on the lipid competition and specificity, we focused on  
137 the results of the simplified models composed of PS/PE/PC unless otherwise specified.

138 As our atomistic simulations were limited to a few  $\mu$ s, they did not allow us to observe lipid ex-



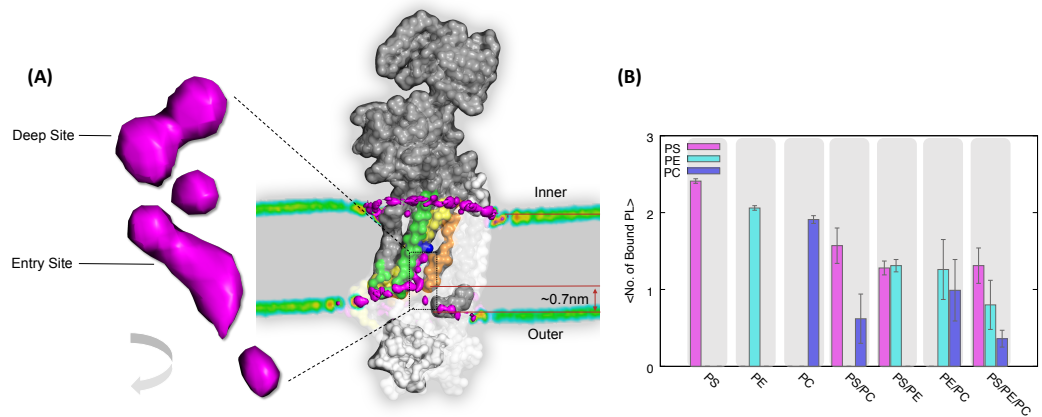

**Figure 3. Lipid binding sites and local membrane deformation.** (A) The average density map of the phosphate head group of bound lipids obtained from a 100  $\mu$ s CG simulation with the PS/PE/PC mixed outer leaflet model (CG5 in Table 1). The average density maps obtained from other independent simulations and with different models are highly similar (Fig. S1). Drs2p and Cdc50p are presented by grey and white surfaces, respectively. TM2, TM4 and TM6 are colored in green, yellow and orange, respectively. The PISL motif in the middle of TM4 is blue. On the left is shown a zoom-in on the phosphate density map, which reveals a few binding sites which we broadly classify into a 'deep site' and an 'entry site' for simplification. The whole protein-membrane complex is shown in a slice view. The local membrane deformation is observed in the regions close to the groove, resulting in  $\sim 0.7$  nm thinning of the membrane bilayer. (B) The average number and types of lipids in the groove obtained from CG simulations with all seven different outer leaflet models. Error bars were estimated with block analysis.

139 change and competition within the groove, nor to investigate whether the substrate can bind more  
 140 deeply inside the protein. We therefore resorted to CG modeling using the popular Martini model  
 141 (Marrink *et al.*, 2007) which has been successfully applied to study a wide range of membrane  
 142 protein systems and their protein-lipid interactions (Corradi *et al.*, 2018, 2019; Muller *et al.*, 2019;  
 143 Ansell *et al.*, 2021). For each lipid and bilayer model, we performed two (replica) simulations, each  
 144 100  $\mu$ s long, (we included an extra replica for the POPS/POPE/POPC mixed outer leaflet model),  
 145 resulting in 1.5 ms of simulations in total, which enabled us to observe additional lipid binding  
 146 events and better sample protein-lipid interactions. We calculated the average density map of the  
 147 phosphate headgroup of the lipids which revealed clusters of lipid binding sites (Fig. 3A). In addi-  
 148 tion to multiple lipid binding sites on the protein surface, we found substantial lipid binding in the  
 149 TM2-TM4-TM6 groove. This occurs both at the mouth of the groove, similar to what we observed in  
 150 the atomistic simulations, and deeper inside the groove all the way up to the conserved PISL motif  
 151 that has been speculated to act as a gate between entry and exit sites (Vestergaard *et al.*, 2014;  
 152 Timcenko *et al.*, 2019).

153 Having established that the long CG simulations enable us to observe reversible lipid binding  
 154 also deeper into the groove, we proceeded to examine which and how many lipids may bind. For  
 155 each of the seven different setups for the outer layer composition, we counted the average number  
 156 of phosphate head groups (separately for POPS/POPE/POPC as relevant for each setup) that occupy  
 157 the groove (Fig. 3B) and made the following observations: (i) All PS/PE/PC lipids can bind to the  
 158 groove, similar to what we observed in atomistic models; (ii) On average about two lipids may  
 159 bind at the same time; (iii) The composition of the lipids inside the groove depends on the lipid  
 160 composition in the outer leaflet, but is not simply proportional to the fraction of lipids in the leaflet.

161 Observation (iii) suggests that there is some selectivity for which lipids bind to/in the groove. In  
 162 particular, it appears that the protein groove shows selectivity for PS over in particular PC lipids,  
 163 but also some preference for PS over PE. This trend of POPS>POPE>POPC is in qualitative agree-  
 164 ment with the experimental observation that PS is the natural substrate of Drs2p, PE is a weaker  
 165 substrate, and PC is not a substrate. However, observation (i) suggests that the entry gate alone

166 is not sufficient to determine the lipid selectivity, ruling out a ‘sole entry gate’ model, and suggest-  
167 ing selectivity is also found elsewhere in the conformational cycle. Observation (ii) agrees with the  
168 cryo-EM structures of ATP8A1 (*Hiraizumi et al., 2019*), Neo1p (*Bai et al., 2021*), Dnf1p, Dnf2p (*He*  
169 *et al., 2020; Bai et al., 2020*) and ATP11C (*Nakanishi et al., 2020a,b*) which together reveal electron  
170 densities suggesting multiple sites. Below, we return to the question of selectivity in the groove  
171 using free energy calculations.

### 172 **Protein induced local deformation of membrane**

173 In addition to observing lipid binding at the single molecule level, we also examined the collective  
174 membrane dynamics to see how the protein impacts its membrane environment. We observed a  
175 remarkable local membrane deformation both in the CG (Fig. 3A and Fig. S1) and atomistic (Fig. S3)  
176 simulations. Comparable deformations are found in all independent CG simulations and models  
177 (Fig. S2), which were all initiated from a flat lipid bilayer. The deformation is only observed on  
178 the outer leaflet side and not the inner leaflet, and only in the region close to the entry of the  
179 groove. The local deformation of the membrane near the entry site to the lipid binding groove  
180 resulted in a ~0.7-1.0 nm thinner membrane in this region, thereby likely facilitating the entry of  
181 lipid headgroups into the groove and shortening the path for lipid transport, reminiscent of the  
182 membrane distortion observed in scramblases (*Bethel and Grabe, 2016; Kalienkova et al., 2019*).

### 183 **Lipid binding preferences by alchemical free energy calculations**

184 In the CG simulations described above we observed extensive and reversible binding of lipids in the  
185 entry site of the binding groove, whereas we only observed limited lipid exchange in the deep site.  
186 This in turn made it difficult to quantify the preference and statistics of lipid binding to this deep  
187 site, and also any potential coupling between binding at the entry and deep site. To help overcome  
188 the sampling problem in unbiased simulations, we used non-equilibrium alchemical free energy  
189 calculations (*Crooks, 1999; Gapsys et al., 2015a; Aldeghi et al., 2019*) to estimate relative binding  
190 free energies for the three different types of lipids and water.

191 Considering that the binding preference of a lipid in one site may also be impacted by what  
192 occupies the neighboring site, we (for each of the two sites) performed the free energy calculations  
193 in four different situations in which the neighboring site is occupied by either POPS, POPE, POPC or  
194 by water (but not any PL). First, we focused on the relative free energy difference between binding  
195 the different PLs to the deep binding site with the entry site occupied by water. The calculations  
196 support and quantify our observation that POPS binds to the deep site stronger than both POPE  
197 and POPC by 5.0 kJ/mol and 8.4 kJ/mol, respectively, when the entry site is filled with water (Fig. 4A).  
198 Therefore the non-equilibrium thermodynamic integration method provides us with additional and  
199 quantitative information about substrate preferences in the deep binding site which was difficult  
200 to obtain from the unbiased MD simulations.

201 To examine how the lipid selectivity in the deep site depends on the molecule bound at the entry  
202 site, we also performed the free energy calculations on the situations with either POPS/POPE/POPC  
203 occupying the entry site (Fig. S4). The results show that the magnitudes, and in a single case also  
204 the sign, of the  $\Delta\Delta G$  values depend on which molecule is bound at the neighbouring site. In all  
205 but one case, POPS binds stronger than both POPC and POPE, though the difference is greatest  
206 when the entry site is filled with water. When the entry site is filled with POPS, the situation re-  
207 verses and the deep site favours (by 0.9 kJ/mol) POPE over POPS, presumably because of repulsive  
208 interactions between the charged headgroups in POPS. Nevertheless, the overall picture is that  
209 the deep site favours POPS over POPE, which in turn binds stronger than POPC. We also note that  
210 although each free energy difference was calculated independently, the thermodynamic cycles are  
211 fully consistent, so that the free energy over a full cycle sums to zero up to statistical uncertainty,  
212 supporting the notion of convergence in the calculations. We also performed free energy calcula-  
213 tions on the entry site, confirming the preference in the order of POPS>POPE>POPC (Fig. 4B and

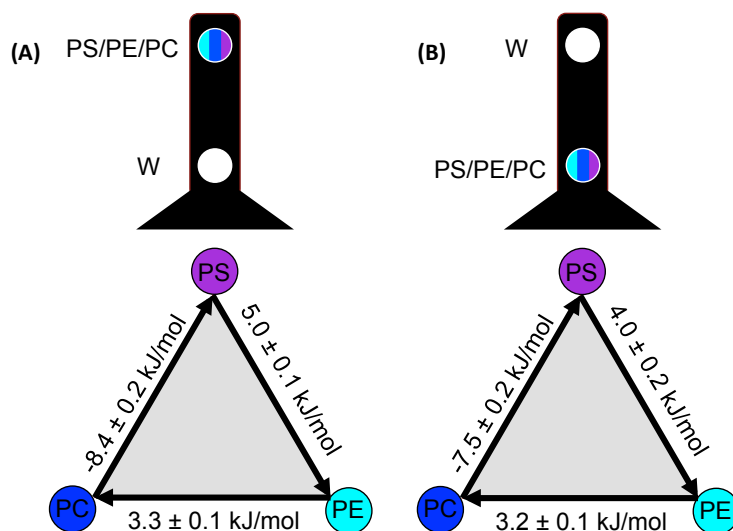

**Figure 4. Substrate binding preferences by free energy calculations.** (A) Relative binding free energy differences between POPS, POPE and POPC in the deep site in the case when the entry site is occupied by water (W). (B) Relative binding free energy differences in the entry site when the deep site is occupied by water.

214 Fig. S4B), and obtained results that were consistent with the trends we observed from the equilib-  
215 rium CG simulations (Fig. 3B).

216 We also attempted comparable alchemical free energy calculations using atomistic simulations  
217 (Fig. S5). Despite extensive simulations (a total of  $6.4 \mu\text{s}$  for each PL transition), these simulations  
218 did not converge as judged for example by the fact that the free energy differences do not sum to  
219 zero over the thermodynamic cycles (sums up to  $\sim 7-9$  kJ/mol).

220 The binding calculations described above capture the known preference for transporting dif-  
221 ferent lipids (POPS>POPE>POPC), lending support to our computational model. Nevertheless, one  
222 might still ask whether the higher affinity to POPS is an artefact of the simulation model as it has  
223 been shown to give rise to higher affinity of anionic lipids to membrane proteins (*Duncan et al.*,  
224 2020). To examine whether the affinity is simply determined by the charge, we also performed the  
225 free energy calculations on the substitution of POPS to other charged PLs, including POPG, POPA  
226 and two artificial molecules (Fig. S6). At the CG level, POPG has the same negative charge as POPS  
227 but with a less polar head group, POPA carries more negative charges than POPS but without a  
228 polar head group, while the other two artificial molecules are the same as POPS except that their  
229 CG phosphate groups carry different charges ( $-2e$  and  $0e$ , respectively). Our calculations revealed  
230 that POPS binds to the deep site more energetically favorable than both POPG and POPA by  $4.9$   
231 kJ/mol and  $15.8$  kJ/mol, respectively, and a POPS-like molecule with an extra negative charge also  
232 binds more weakly (Fig. S6). Thus, we suggest that even at the CG level, the determined differences  
233 in affinity and specificity are not just solely a consequence of electrostatic interactions.

#### 234 Lipid binding to the deep site is more energetically favorable than to the entry site

235 The alchemical free energy calculations quantified the preference of one PL relative to another at  
236 the same binding site; however they cannot tell us the relative affinity of the same lipid at the two  
237 different (entry and deep) sites. The unbiased MD simulations did also not answer this question  
238 because of the competition between different PLs and the slow PL exchange in the deep site. Thus,  
239 to examine which site in the groove is more energetically favorable for the binding of a specific PL,  
240 we used restraints to avoid the exchange of lipids between the groove and the outer leaflet. In  
241 this way, a single PL may freely explore the groove without competition with other PLs. This was

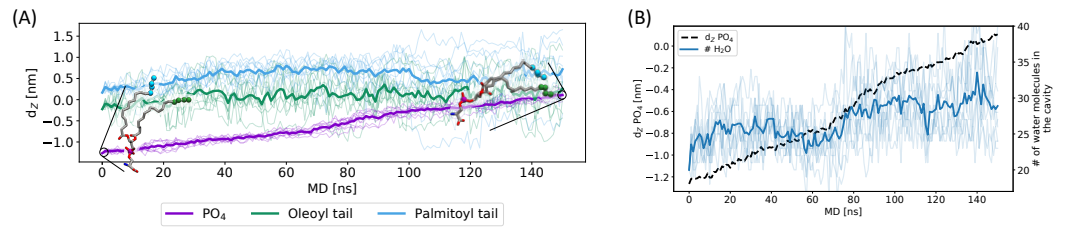

**Figure 5. Dynamics and solvation of the lipid as it moves up in the groove.** (A) Locations (along the Z axis) of the phosphate head group (purple) and ends of the two acyl chains (green and cyan) during ten 150 ns-long atomistic SMD simulations with the POPS/POPE/POPC mixed outer leaflet model (AA5). In these simulations the phosphate head group was biased to move towards the deep site during the SMD simulations while the lipid tails were left unrestrained. The thin lines show the results from each simulation while the thick lines represent the average locations. The results show how the POPS lipid performs an approximate 90-degree rotation of the whole lipid as the head group moves up the groove. (B) Number of water molecules in the cavity (right axis; dark blue line shows average while thin blue lines show each of the simulations) and phosphate location along the Z axis (left axis; black dashed line) during the SMD simulations. In both A and B,  $d_z = 0$  corresponds to the center of the membrane while  $d_z = -1.1$  nm corresponds to the lipid head group being in the luminal entry site.

242 achieved by performing MD simulations of the original POPS/POPE/POPC mixed outer layer model  
243 in the presence of restraints, and the results reveal that lipids favour the deep binding site (~8.0  
244 kJ/mol) over the entry site (Fig. S7). Thus, our results suggest that the entry site is a transient  
245 intermediate towards to the deep site, and reveal a picture that once the substrate enters the  
246 groove, it will move to the deep site driven by the free energy gradient.

### 247 Lipid head group slides in the groove with the tails anchored in the centre of the 248 bilayer

249 The recent spur of high resolution structures of P4 flippases has provided a wealth of information  
250 about the overall structure and conformational changes in this class of proteins. They have, how-  
251 ever, only provided limited information about the interactions between the protein and the lipid  
252 substrates. X-ray diffraction and cryo-EM experiments on ATP8A1, ATP11C, Neo1p and Dnf1p/Dnf2p  
253 show density for PL head groups, but it is not possible to see the whole hydrophobic acyl chains  
254 due to their high flexibility. Our MD simulations revealed that the TM2-TM4-TM6 groove on the  
255 surface of Drs2p could accommodate one or more PL head groups whose binding locations might  
256 imply a sequential transport path from the outer layer towards the central PISL motif. Here the  
257 PL would likely trigger dephosphorylation and conformational changes leading to occlusion and  
258 subsequently opening to the inner leaflet.

259 The observation that only the head group of the PL is bound in the groove is consistent with the  
260 so-called 'credit card' model (Pomorski and Menon, 2006; Morra et al., 2018). The MD simulations,  
261 however, provide us with a unique opportunity to see how the lipids orient their hydrophobic tails  
262 during binding and initial transport as their head groups move towards the PISL motif. We thus  
263 used all-atom steered MD (SMD) simulations (AA5 model) to study the process of the lipid moving  
264 from the entrance of the groove to the deep site and PISL motif. Specifically, we accelerated the  
265 movement of the lipid by biasing the phosphate head group to move towards the deep site, while  
266 not directly biasing the flexible tails of the lipid molecule. Examining ten such SMD simulations we  
267 find that the ends of the lipid tails stay near the middle of the membrane bilayer while the PL head  
268 group moves up, thus changing the PL configuration from 'vertical' to more 'horizontal' (Fig. 5A).  
269 We observed a similar change of the conformation of the PL in an unbiased CG simulation (Fig. S8).  
270 Together, these results suggest that the role of the flippase is to transport the polar head group,  
271 which in itself would not easily pass the membrane, while the hydrophobic tails stay in contact with

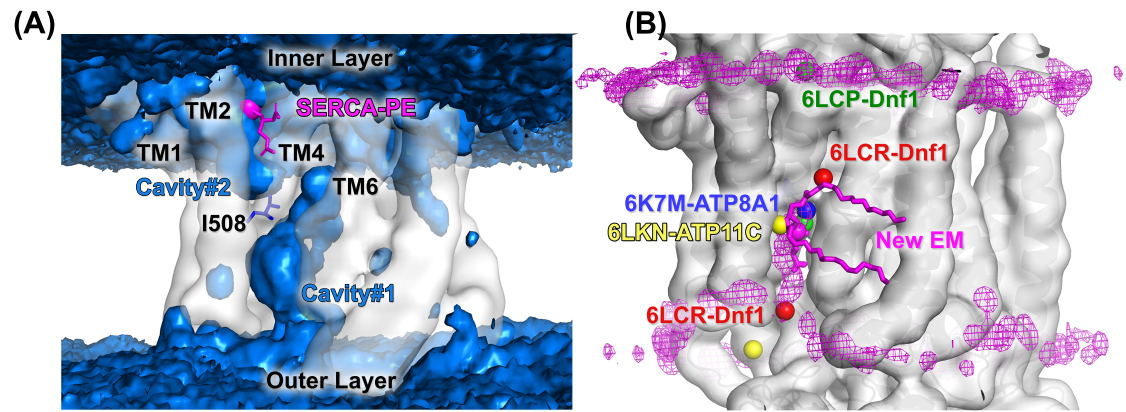

**Figure 6. Water-filled cavities and lipid binding regions in P4 flippases.** (A) Average density map of the oxygen atoms in the water molecules (blue surface) obtained from a 500 ns atomistic MD simulation with the pure POPS outer layer model (AA1 model) revealing cavities near the outer layer (overlapping with the TM2-TM4-TM6 groove) and inner layer (formed between TM1, TM2 and TM4). The Ile508 residue, shown in blue sticks, is a part of the PISL motif that separates these two water-filled cavities. (B) The average density map of the phosphate head group obtained from coarse-grained simulations with the CG5 model (magenta mesh) is superposed with the location of PL in several experimentally-determined flippase structures. These structures include our newly determined cryo-EM structure of a PL-bound E2P state of Drs2p, where we were able to model a substantial part of the POPS head group and tails (shown by sphere and sticks in magenta), as well as the PL phosphates in the E2Pi state of ATP8A1 (PDB 6K7M (Hiraizumi *et al.*, 2019), blue sphere), the E2P state of ATP11C (PDB 6LKN (Nakanishi *et al.*, 2020a), yellow), the E2P and E1-ATP states of Dnf1 (PDB 6LCP and 6LCR (He *et al.*, 2020), green and red).

272 the lipid bilayer during the transport process, providing direct support of a 'credit-card'-like model,  
273 at least for the half-reaction we examined. We also observe that the PL head group stays hydrated  
274 as it moves up the groove, suggesting that water plays an integral role in lipid transport (Fig. 5B; see  
275 also discussion further below).

### 276 **Two separated water-filled cavities formed within TM domain**

277 The next question we asked was if water plays a role during the lipid binding process. To address  
278 this question, we continued to use an atomistic model (AA1) to enable a more fine-grained descrip-  
279 tion of the water molecules in the groove. Starting from the cryo-EM structure of the Drs2p-Cdc50p  
280 complex with a dry TM core, we observed a substantial amount of water permeate quickly through  
281 the small gap between TM1-3 (from the inside) and the slightly bigger gap formed between TM1-  
282 TM2 loop and TM5-TM6 loop (from the outside) to fill two separated cavities in the hydrophobic  
283 TM core of Drs2p. These are formed between TM1, TM2, TM3 and TM4 near the inner layer and be-  
284 tween TM1, TM2, TM4 and TM6 near the outer layer, respectively (Fig. 6A). These two water-filled  
285 cavities are separated by the side chain of Ile508 in the PISL motif, and we did not observe any  
286 exchange of water between the cavities, highlighting the possible important role of the PISL motif  
287 as a hydrophobic gate (Vestergaard *et al.*, 2014).

288 To examine more closely the functional role of the PISL motif as a seal between these two water-  
289 filled cavities, we truncated the side chain of Ile508 to generate the both Ile508Ala and Ile508Gly  
290 variants and investigated these by atomistic simulations. In simulations of both variants the two  
291 cavities merged, and we rapidly observed water exchange between them after in tens of nanosec-  
292 onds (Fig. S9), demonstrating the key role of Ile508 in the gate.

293 A hydrated groove may be an important prerequisite for binding and transport of polar or  
294 charged lipid head groups. In the SMD simulations, we found that the number of water molecules  
295 in the cavity did not decrease as the PL head group moved up towards the PISL motif; instead



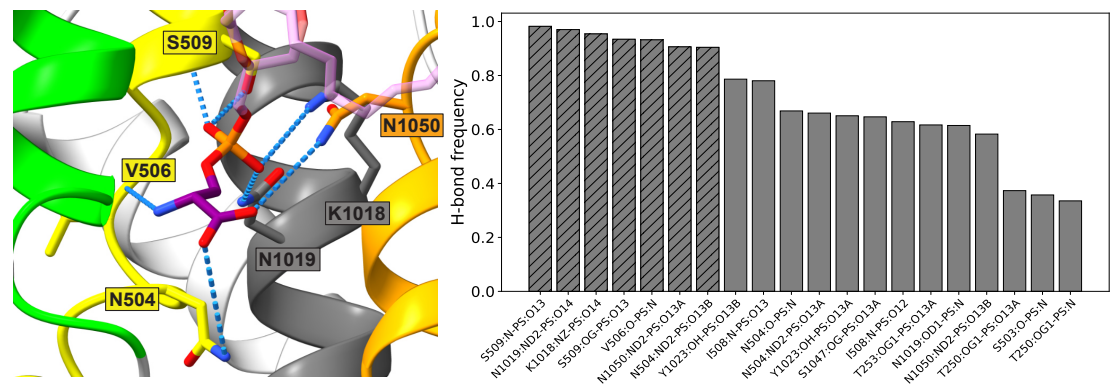

**Figure 7. Protein-substrate interactions in a cryo-EM structure and simulations of a POPS-bound active E2P state of Drs2p.** Hydrogen bonds between Drs2p and a bound POPS in the new EM structure of the active E2P state. (A) Structural representation of the seven most frequently formed hydrogen bonds (blue dashed lines) between Drs2p and the bound PS (sticks, transparent lipid tail) in the deep site. Side chains of hydrogen bond partners are represented as sticks. Residues are colored as TM4 (yellow), TM5 (grey) and TM6 (orange). (B) Fraction of time the 20 most frequent hydrogen bonds are formed between Drs2p and the bound PS molecule over 500 ns from an atomistic simulation. Hatched bars are the hydrogen bonds highlighted in panel A.

296 we found a small increase of the number of water molecules accompanying the PL head group  
 297 (Fig. 5B). This suggests a coupling between lipid binding and hydration of the groove, and may imply  
 298 an important role of water on lipid movement by hydrating the polar head group. We note that in  
 299 the CG MD simulations, we also observed a water-filled cavity in the outer leaflet side although the  
 300 number of water molecules was less than that observed in the atomistic simulations, even after  
 301 correcting for the fact that one CG water molecule corresponds to four actual water molecules  
 302 (Fig. S10). We did not observe the cavity on the inner leaflet side to be filled by water in the CG  
 303 simulations, perhaps because the gap on this side is too narrow to allow the bigger CG water to  
 304 enter.

### 305 Cryo-EM structure of a PS-bound PI4P-activated E2P state

306 Having examined the pathway by which PLs bind to and move up the groove we next set out to  
 307 analyse the structural details on how Drs2p recognizes the PL head group in the deep site. In  
 308 addition to the E2P structure of Drs2p (*Timcenko et al., 2019*), which formed the starting point  
 309 for the simulations described above, we recently determined structures of Drs2p in several E1  
 310 states as well as a PS-occluded E2-AIF<sub>4</sub> bound form (mimicking [PS]E2-Pi) (*Timcenko et al., 2021*).  
 311 We here extended these studies to determine a structure of a PS-bound PI4P-activated E2P state,  
 312 providing us with the possibility to examine the interactions between PL and Drs2p in the deep  
 313 site (Fig. S15). We note that in contrast to our previous E2P structure (*Timcenko et al., 2019*), in  
 314 which phosphorylation is mimicked by BeF<sub>3</sub><sup>-</sup>, this structure was obtained through incubation with  
 315 ATP and is in a phosphorylated E2P state and interestingly also has an ATP bound in the N-domain.  
 316 We thus built a model of POPS-bound E2P state based on the EM map, and find that the location of  
 317 the PL head group in this structure is indeed in the location predicted by our simulations (Fig. 6B).  
 318 We further used this structure as starting point for a 500 ns-long unbiased all-atom simulation of  
 319 this state. The simulation showed a stable complex structure, and revealed an intricate network of  
 320 hydrogen bonding interactions that help stabilize the POPS head group inside the protein (Fig. 7).

### 321 Discussion

322 Biochemical and biophysical experiments have shed light on how the relatively large and am-  
 323 philic PL substrates are recognized and transported unidirectionally by flippases, members of

324 the P4 P-type ATPase family. The mechanism of recognition and transport of substrates is under-  
325 stood in exquisite detail for certain ion transporters in the P2-ATPase family, such as NKA and  
326 SERCA. It is, however, much less clear for P4 flippases, although a recent series of high-resolution  
327 structures of several flippases have resulted in detailed insights into the overall architecture and  
328 basic functional cycling of this class of molecules (*Timcenko et al., 2019; Bai et al., 2019; Hiraizumi*  
329 *et al., 2019; Nakanishi et al., 2020a; He et al., 2020; Nakanishi et al., 2020a; Bai et al., 2020; Tim-*  
330 *cenko et al., 2021*). The EM structure of Drs2p in a PI4P-activated E2P state reveals an empty  
331 outward-open groove on the surface of Drs2p bordered by TM2, TM4 and TM6 which was specu-  
332 lated to serve as a pathway for lipid entry (*Timcenko et al., 2019*). The activated E2P state of Drs2p  
333 represents a functional state with its binding pocket open to the outer leaflet, so is assumed to  
334 be ready to bind the lipid substrate from the outer leaflet of the membrane as an initial step for  
335 the substrate transport. The structure, however, did not capture the lipid substrates, the mem-  
336 brane nor the water molecules, leaving room for further studies using complementary tools, such  
337 as molecular simulations to understand these important details.

338 We have here used the outward-open structure as a starting point for providing insight into  
339 the first part of the transport cycle, examining the following questions: (i) where do the lipids bind  
340 to the flippase?, (ii) how do the lipids move?, (iii) which part of the functional cycle gives rise to  
341 substrate selectivity?, (iv) does water play a role in lipid binding or transport, and (v) how is the  
342 membrane influenced by the flippase structure, and could membrane deformations play a role in  
343 function?

344 In line with an earlier proposal based on the cryo-EM structure of Drs2p (*Timcenko et al., 2019*)  
345 and the reported substrate-bound structures of ATP8A1 (*Hiraizumi et al., 2019*), ATP11C (*Nakan-*  
346 *ishi et al., 2020a,b*), Dnf1 (*He et al., 2020; Bai et al., 2020*) and Dnf2 (*Bai et al., 2020*), we observed  
347 that substrate lipids enter to the TM2-TM4-TM6 groove. The groove contains multiple potential  
348 binding sites which we broadly classified into an entry and deep site. We find that the location of  
349 the deep site overlaps with the density maps of the phosphorus head group of the lipids observed  
350 in our new EM structure of the E2P state of Drs2p as well as previous EM structures of the E2P<sub>i</sub>  
351 state of ATP8A1 (*Hiraizumi et al., 2019*), the 'E2-site1' in the EM structure of the E2P state of Dnf1  
352 (*He et al., 2020*) and the crystal structure of the E2P state of ATP11C (*Nakanishi et al., 2020a,b*),  
353 while the location of the entry site overlaps with the so-called 'E1-site2' in the E1 state of Dnf1 (*He*  
354 *et al., 2020*) (Fig. 6C). Note that the site close to TM3-4 loop in the crystal structure of ATP11C and  
355 the 'E1-site1' in the EM structure of Dnf1 were not sampled in our coarse-grained MD simulations  
356 likely because that the ATP11C structure was captured in a different lipid environment used for  
357 crystallisation while the latter site was captured in a different state. We find that all three types  
358 of lipids we examined (POPS, POPE, POPC) bind more strongly, by about 8 kJ/mol, to the deep  
359 site than the entry site, indicating that the entry site is a transiently formed intermediate site be-  
360 fore moving to the deep site along the transport pathway. In addition, the calculated density map  
361 around the groove also suggests at least two possible routes to enter to the groove: one uses a  
362 binding site near the TM1-TM2 loop, and another, apparently more favourable, initiating from the  
363 cavity formed between the tips of TM2, TM6 and TM9.

364 During the binding to the deep site, the lipid slides its head group along the groove, but keeps  
365 its acyl chains projected out into the membrane bilayer, without significant lateral movement. The  
366 lipid tails remain 'anchored' in the middle of the membrane, so that the whole lipid rotates ap-  
367 proximately 90 degrees as the head group moves from the outer leaflet to the deep site. In other  
368 words, during the first half of the transport process, the substrate does not need to move its hy-  
369 drophobic tails much, in line with the expectation that the movement of the hydrophilic headgroup  
370 is the most energetically unfavourable step. We speculate that for the subsequent second half of  
371 the transport event, the flippase uses the same 'lipid tail anchor' mechanism to completely flip the  
372 substrate to the inner leaflet.

373 Both our unbiased simulations as well as the alchemical free energy calculations suggest a  
374 preference for binding PL substrates in overall accordance with the known substrate specificity for

375 full transport (POPS>POPE>POPC). We, however, also find that the very poorly transported POPC  
376 can also bind to the groove. The alchemical free energy calculations suggest the free energy of PS  
377 binding is ~3-5 kJ/mol lower than that of PE, and ~6-8 kJ/mol lower than PC although the relative  
378 free energy differences to a certain degree depend on what molecule occupies the neighboring  
379 site. The free energy difference we found for binding of POPS vs POPE to the deep site (5 kJ/mol)  
380 corresponds to a ~ 7-fold stronger binding of POPS. Unfortunately, the transport rates of individual  
381 lipids by Drs2p have not been determined, making it difficult to compare these numbers directly  
382 to experiments. Nevertheless, the overall order of selectivity follows that obtained from ATPase  
383 assays (*Azouaoui et al., 2014*). We suspect, however, that the selectivity obtained from binding  
384 alone is smaller than the difference in overall transport rates of PS vs PE lipids, which would suggest  
385 that some but not all of the substrate selectivity can be explained by the difference in binding to  
386 the protein in the outward open state. In that case, the remaining part of the selectivity could e.g.  
387 come from a difference in the ability to trigger dephosphorylation and eventually transition into  
388 an inward open E1 state (*Baldrige and Graham, 2013; Vestergaard et al., 2014*). Indeed, we find  
389 that PL head groups make a number of specific hydrogen-bonding interactions in the deep site,  
390 and we speculate that these are important for triggering the conformational changes.

391 We observed rapid water entry into two distinct cavities in our all-atom simulations, which were  
392 initiated from the cryo-EM structure with these cavities empty. We must assume that these cavities  
393 are also filled with water in the cryo-EM experiments, only not visible, so that this filling represents  
394 the experimental structures. The two water-filled cavities are located on opposite sides of the  
395 membrane and are separated by the highly conserved PISL motif, which was also previously pro-  
396 posed to serve as a gate to control the lipid selectivity (*Vestergaard et al., 2014*). However, given  
397 the structural differences between Drs2p and the SERCA derived homology model, the location  
398 and geometry of these water cavities are different. Importantly, during our simulations, these two  
399 cavities were strictly isolated without water exchange between them, but only to the intra- and  
400 extracellular environment, respectively, supporting the functional role of the PISL motif as a hy-  
401 drophobic gate.

402 We then used biased, atomistic MD simulations to accelerate the lipid movement up the groove,  
403 and observed that the head group of the lipid interacts with a substantial number of water molecules  
404 during the binding process, implying the important role of water during the lipid transport. Such  
405 water-filled cavities have also previously been observed in MD simulations of a homology model of  
406 the mammalian flippase ATP8A2 (*Vestergaard et al., 2014*) and of SERCA (*Saleh et al., 2019*). There-  
407 fore it would be interesting to investigate if the presence of water-filled cavities could be a general  
408 feature in the whole family of P-type ATPases. Interestingly, some crystal structures of SERCA (PDB  
409 ID 2AGV, 3AR4, 3W5C and 3W5D) (*Obara et al., 2005; Toyoshima et al., 2011, 2013; Drachmann  
410 et al., 2014*) captured a PE molecule bound specifically in the same location that overlaps with  
411 the water-filled cavity on the inner cytosolic layer (Fig. S11). Moreover, the Drs2p-specific residue  
412 Phe511, which is four residues from the Pro507 in the PISL motif (thus also known as the 'proline +  
413 4' residue), extends its side chain to this cytosolic cavity, and has been confirmed to be involved in  
414 PS selection of Drs2p and assumed to serve as the 'exit gate' as proposed in the 'two-gate' model  
415 (*Baldrige and Graham, 2012*). Thus, P4 flippases may have evolved a capacity to use this cavity  
416 to select lipids using the 'exit gate' residues and drive out the substrates to the inner leaflet in the  
417 subsequent E2→E1 transition.

418 Finally, we also observed that the protein induces a local deformation of the membrane in the  
419 outer layer around the entry point of the lipid-transport pathway. This deformation leads to a ~0.7-  
420 1.0 nm thinning of the membrane, which we suggest might facilitate the movement of hydrophilic  
421 head groups across the membrane. A local membrane deformation has been observed in the ATP-  
422 independent bidirectional lipid scramblases both computationally and experimentally (*Bethel and  
423 Grabe, 2016; Jiang et al., 2017; Kalienkova et al., 2019*). The local deformation may facilitate the  
424 initial binding of the substrate and the hydration of the groove may further help the movement of  
425 the head group of the substrate to a deeper location which serves as a start point for accomplishing

426 the second half of the transport cycle.

427 We do note some limitations in our study. First, simulations are limited by the accuracy of the  
428 force fields used and eventually need experimental testing. Our simulations may, for example,  
429 be used to guide further mutational analyses or experiments that probe the role of water in lipid  
430 transport. Second, simulations are also limited by the accessible time scales and in their ability  
431 to capture changes in ‘chemistry’ such as a change in phosphorylation or protonation. For these  
432 reasons, we focused our study on the first part of the transport process, where a PL is taken up  
433 from the outer leaflet and the head group moves towards the centre of the bilayer, next to the PISL  
434 motif. Our results suggest that substrate binding to the deep site in the groove explains some, but  
435 not all, of the substrate selectivity, and we suggest that lipid-induced conformational change of  
436 the flippase also contributes to the lipid selectivity. More computationally-demanding atomistic  
437 simulations, possibly aided by enhanced sampling techniques, are likely needed to provide more  
438 detailed insight into the coupling between protein conformational change and lipid transport dur-  
439 ing the following steps, such as dephosphorylation and the E2→E1 transitions.

440 Taken together, our MD simulations and EM structure provide molecular details on lipid bind-  
441 ing, membrane deformation and groove hydration, deepen the understanding of the dynamic  
442 transport processes otherwise inaccessible from snapshot single-particle cryo-EM and X-ray crys-  
443 tal structures and quantify the substrate preference on the binding sites. Our results support the  
444 notion that the groove outlined by the transmembrane segments 2, 4 and 6 serves as the first half  
445 pathway for lipid translocation, and identified the presence of multiple lipid binding sites in the  
446 groove. The results suggest the substrate preference is not determined by a single site but likely  
447 by the whole pathway, including the interactions that trigger occlusion by the binding coordination  
448 at the deep site and lead to dephosphorylation. Future studies are needed to determine and vali-  
449 date these interactions, and likely need an atomistic view of the binding of PL to the deep site and  
450 coupling to the dephosphorylation reaction.

## 451 **Materials and methods**

### 452 **System preparation**

453 We used the EM structure of the PI4P-activated E2P state (PDB code 6ROJ) to model the E2P state  
454 of the Drs2p-Cdc50p complex. The aspartate beryllium trifluoride in the cryo-EM structure was  
455 modeled as a double negatively-charged phosphorylated Asp. The Mg<sup>2+</sup> ion, the PI4P molecule, and  
456 two disulfide bonds in Cdc50p were kept in the model. The terminal segments missing in the cryo-  
457 EM structure were considered as flexible tails, and not included in our model to save computational  
458 cost. On the basis of the predictions by PROPKA (*Olsson et al., 2011*), Glu550, Glu655, Glu798,  
459 Glu1042 in Drs2p were assigned to be protonated and Lys283 in Cdc50p was deprotonated.

### 460 **Atomistic simulations**

461 We used the CHARMM36m force field (*Huang et al., 2016*) for the protein. Force field paramet-  
462 ers for PI4P were generated using the CHARMM General Force Field (CGenFF) (*Vanommeslaeghe*  
463 *et al., 2009*) and the CHARMM-GUI web interface (*Qi et al., 2015*). Force field parameters for the  
464 phosphorylated Asp560 were as previously described (*Das et al., 2017; Saleh et al., 2019*).

465 POPS (1-palmitoyl-2-oleoyl-sn-glycero-3-phosphoserine), POPE (1-palmitoyl-2-oleoyl-sn-glycero-  
466 3-phosphoethanolamine), and POPC (1-Palmitoyl-2-oleoyl-sn-glycero-3-phosphocholine) were used  
467 as PS, PE and PC, lipids respectively. The Drs2p-Cdc50p complex was embedded into a series of  
468 asymmetric lipid bilayers with 67%POPE:33%POPS in the cytosolic leaflet and different composi-  
469 tions of mixed POPC, POPE and POPS in the luminal leaflet (Table 1). To mimic a yeast-like mem-  
470 brane, POPA (1-palmitoyl-2-oleoyl phosphatidic acid), POPI (1-palmitoyl-2-oleoyl phosphatidylinos-  
471 itol), POPG (1-palmitoyl-2-oleoyl phosphatidylglycerol) and ergosterol (ERG) were mixed together  
472 with POPS, POPE and POPC (AA6 model). The systems were solvated with a 0.1 M NaCl aqueous so-  
473 lution, resulting in ~340,000 atoms in total. The dimensions of the equilibrated box were 13.8 nm,

**Table 1. Atomistic and CG MD simulations of PI4P activated E2P state of the Drs2p-Cdc50p complex**

| Name | Model      | Components of luminal leaflet                       | Length        |
|------|------------|-----------------------------------------------------|---------------|
| CG1  | Martini2.2 | 100%POPS                                            | 2x100 $\mu$ S |
| CG2  | Martini2.2 | 100%POPE                                            | 2x100 $\mu$ S |
| CG3  | Martini2.2 | 100%POPC                                            | 2x100 $\mu$ S |
| CG4  | Martini2.2 | 50%POPE:50%POPS                                     | 2x100 $\mu$ S |
| CG5  | Martini2.2 | 33.3%POPC:33.3%POPE:33.3%POPS                       | 3x100 $\mu$ S |
| CG6  | Martini2.2 | 50%POPC:50%POPS                                     | 2x100 $\mu$ S |
| CG7  | Martini2.2 | 50%POPC:50%POPE                                     | 2x100 $\mu$ S |
| CG8  | Martini2.2 | 1POPS:1POPE:1POPC:1POPG:1POPA:1POPI:2CHOL           | 4x10 $\mu$ S  |
| AA1  | CHARMM36m  | 100%POPS                                            | 500 ns        |
| AA2  | CHARMM36m  | 100%POPE                                            | 500 ns        |
| AA3  | CHARMM36m  | 100%POPC                                            | 500 ns        |
| AA4  | CHARMM36m  | 50%POPE:50%POPS                                     | 500 ns        |
| AA5  | CHARMM36m  | 33.3%POPC:33.3%POPE:33.3%POPS                       | 3+2+2 $\mu$ S |
| AA6  | CHARMM36m  | 4%POPS:20%POPE:30%POPC:2%POPG:4%POPA:20%POPI:20%ERG | 500 ns        |

474 13.8 nm and 17.1 nm in the x, y and z dimension, respectively (Fig. S12).

475 The temperature was kept constant at 310 K using the Nose-Hoover thermostat with a 1 ps  
 476 coupling constant, and the pressure at 1.0 bar using the Parrinello-Rahman barostat with a 5 ps  
 477 time coupling constant. We used a cutoff of 1.2 nm for the van der Waals interactions using a  
 478 switching function starting at 1.0 nm. The cutoff for the short-range electrostatic interactions was  
 479 at 1.2 nm and the long-range electrostatic interactions were calculated by the means of the particle  
 480 mesh Ewald decomposition algorithm with a 0.12 nm mesh spacing. A reciprocal grid of 120 x 120  
 481 x 144 cells was used with 4th order B-spline interpolation.

### 482 Coarse-grained modeling and simulations

483 The atomic coordinates of the Drs2p-Cdc50p complex in E2P state were converted to the CG Martini  
 484 representation by the modified martinize.py script (version 2.6) (De Jong *et al.*, 2013) obtained from  
 485 the MARTINI website (<http://www.cgmartini.nl/>). The ElnDyn elastic-network approach was em-  
 486 ployed to restrain the protein secondary and tertiary structure, using a force constant of  $500\text{kJ/mol/nm}^2$   
 487 and a cut off of 0.9 nm. Position restraints were further applied to the backbone beads to keep the  
 488 system in the activated E2P state and also facilitate the analysis on the lipid binding. The CG struc-  
 489 ture was embedded in a series of asymmetric mixed lipid membranes (Table 1) and solvated with  
 490 MARTINI water using insane.py in a  $12.5 \times 12.5 \times 18\text{nm}^3$  box (Fig. S12). To prevent unwanted freezing,  
 491 10% of the MARTINI water particles were replaced by the 'antifreeze' water particles. The systems  
 492 were neutralized by adding NaCl at a concentration of 0.15 M.

493 We used the MARTINI force field version 2.2 for all CG simulations. Standard MD parameters  
 494 ([http://cgmartini.nl/images/parameters/exampleMDP/martini\\_v2.x\\_new-rf.mdp](http://cgmartini.nl/images/parameters/exampleMDP/martini_v2.x_new-rf.mdp)) with minor adjust-  
 495 ments were used to set up the simulations. Briefly, the simulations were performed in the semi-  
 496 isotropic NPT ensemble using the v-rescaling thermostat to maintain temperature at 310 K and the  
 497 Parrinello-Rahman barostat to control the pressure at 1 bar with a compressibility of  $3 \times 10^{-4}\text{bar}^{-1}$   
 498 and a coupling constant of 12 ps. Electrostatic interactions were treated using a reaction field with  
 499 a dielectric constant of 15. The non-bonded interactions were cut-off at 1.1 nm. The simulations  
 500 were performed using a 20 fs integration time step. The Verlet neighbor search algorithm was used  
 501 to allow for GPU-accelerated simulations.

502 All atomistic and CG MD simulations were performed using Gromacs (Abraham *et al.*, 2015)  
 503 2018 or 2019 if not specially specified. Trajectories were saved and analyzed every 1 ns.



## 504 Alchemical free energy calculations

505 We used non-equilibrium alchemical free energy calculations (*Gapsys et al., 2015a; Aldeghi et al.,*  
506 *2019*) to determine the relative free energy difference between different substrates in a single  
507 binding site. To avoid problems arising when changing the total charge, we combined the two  
508 branches of the thermodynamic cycle into a single transition by performing  $PLA_{bilayer} \rightarrow PLB_{bilayer}$   
509 and  $PLB_{site} \rightarrow PLA_{site}$  transitions at the same time (Fig. S13). By using this so-called 'double-  
510 system/single-box' setup (*Aldeghi et al., 2019*), we obtained  $\Delta\Delta G$  in a single set of calculations  
511 without the need of separate calculations of  $\Delta\Delta G_3$  and  $\Delta\Delta G_4$  (Fig. S13). In these calculations, we  
512 thus mutated one lipid in the outer layer (chosen to be at least 5 nm away from the protein), while  
513 the opposite transformation was performed for a lipid bound in the substrate-binding groove.

514 We used a single topology approach to define a hybrid topology that contains both end states  
515 for the alchemical transformations. First, we extracted the equilibrium ensembles of the CG sys-  
516 tem for the corresponding end states from the 100  $\mu s$  long MD simulations. We then performed  
517 100 4-ns long fast-growth transition simulations starting from 100 equally spaced frames from  
518 the equilibrium ensembles. We performed the procedure twice with a different reference lipid  
519 in the outer layer to examine the dependence on the local membrane environment, so resulting  
520 in 400 simulations (100 transitions x 2 directions x 2 reference lipids) for each  $\Delta\Delta G$  estimation.  
521 The work performed by the system was then calculated by numerical integration of the  $\partial H/\partial\lambda$   
522 curves for each transition. Finally, the free energy difference between the two end states was es-  
523 timated from the overlap of the two accumulated work distributions for both directions using the  
524 Bennett Acceptance Ratio (BAR) estimator (*Shirts et al., 2003*). Uncertainties were estimated as  
525 the standard errors of the BAR estimates by bootstrap analysis on all 200 related non-equilibrium  
526 trajectories using the pmx tool (*Gapsys et al., 2015b*). All alchemical simulations were carried out  
527 using Gromacs 2019.5.

## 528 Steered MD simulations

529 As the starting point for a set of ten 150 ns-long steered MD simulations we used an equilibrated  
530 system from the AA5 simulations (Table 1) with a POPS in close proximity to the entry site on the  
531 outer leaflet of the membrane. Simulation parameters were as described above. We used  
532 GROMACS 2019.6 with PLUMED v2.5 (*Bonomi et al., 2009; Tribello et al., 2014*) for the simulations.  
533 The bias was implemented with MOVINGRESTRAINT using the z-component of the distance be-  
534 tween the phosphate of a POPS in the luminal entry site and the center of the membrane (C $\alpha$  of  
535 ASN504 and LEU505) to steer the lipid to the centre of the membrane with  $\kappa = 1000 kJ/mol/nm^2$ .  
536 The number of water molecules in the cavity was counted using VMD v1.9.4a43 (*Humphrey et al.,*  
537 *1996*). Briefly, the cavity was represented by two spheres around the center of mass between  
538 the CA atoms of THR253, SER509, THR1045 (COM1) and THR249, ASN504, SER 1043 (COM2), re-  
539 spectively. The sphere radii were 1 nm and 0.8 nm for COM1 and COM2, respectively. The water  
540 molecules within the two spheres were counted every 1 ns.

## 541 Cryo-EM structure of the PS bound E2P state of Drs2p-Cdc50p

### 542 Grid preparation and data collection

543 Drs2p-Cdc50p was purified as previously described (*Timcenko et al., 2019*). To capture a PS-bound  
544 phosphorylated E2P state, we incubated 0.6 mg/mL Drs2p-Cdc50p in 0.03 mg/mL lauryl maltose  
545 neopentyl glycol (LMNG) with 0.1 mg/mL 16:0-18:1 PS (POPS) in LMNG (resulting in a final LMNG  
546 concentration of 0.09 mg/mL) for 1 hr.

547 C-flat Holey Carbon grids, CF-1.2/1.3-4C (Protochips) were glow discharged for 45 s at 15 mA just  
548 prior to use. Right before 3  $\mu L$  sample was added to the grid, 0.6  $\mu L$  of 20mM adenosine triphos-  
549 phate (ATP) was added. The grids were vitrified on a Vitrobot IV (Thermo Fisher Scientific) at 4  $^{\circ}C$   
550 and 100% humidity.

551 We acquired a total of 9837 movies from two separate grids on a Titan Krios G3i (EMBLION  
552 Danish National cryo-EM Facility — Aarhus node) with an X-FEG operated at 300 kV on a Gatan

553 K3 camera with a Bioquantum energy filter at a slit width of 20 eV. We collected 1.5 s exposures  
554 in super-resolution mode using aberration free image shift data collection (AFIS) in EPU (Thermo  
555 Fisher Scientific) at a physical pixel size of 0.66 Å/pixel (magnification of 130,000x) with a total  
556 electron dose of 60 e<sup>-</sup>/Å<sup>2</sup>.

### 557 Data processing

558 We performed data processing in cryoSPARC v2 (*Punjani et al., 2017*) (and v3 for later steps). Patch  
559 Motion Correction and Patch CTF Estimation were performed, after which 991 micrographs were  
560 rejected based on a poor CTF fit, thick ice, or too much movement, leaving 8846 micrographs for  
561 further processing. Initially the blob picker, using a cylindrical reference was used to pick 32,802  
562 particles from 300 micrographs. These were used for generating picking templates from 2D classifi-  
563 cation, which were used to pick 691,521 particles from 3464 micrographs (first grid) and 2,337,881  
564 particles from 5382 micrographs (second grid). The good 2D classes from the initial small stack  
565 were used to generate an *ab initio* 3D reference, while a poor class was used to generate a junk class.  
566 Particles were extracted in a 400-pixel box and downsampled to a 256-pixel box at 1.0312 Å/pixel.  
567 The two stacks were subjected separately to multiple rounds of heterogeneous 3D refinement with  
568 one good reference and multiple junk references. The 668,160 protein-like picks were combined  
569 and subjected to one round of *ab initio* 3D refinement, and the 531,985 particles were refined into  
570 a consensus volume with reported resolution of 2.9 Å by non-uniform (NU) refinement (*Punjani*  
571 *et al., 2020*).

572 We subjected the remaining particles to two rounds of 3D variability analysis (3DVA) (*Punjani*  
573 *and Fleet, 2021*), first to select for open E2P states (205,221 particles), and secondly to select for  
574 particles with PS-bound in the transport pathway. The selected 162,243 particles were subjected  
575 to two rounds of *ab initio* 3D refinement, before the final stack of 91,415 particles was refined to  
576 3.1 Å using NU-refinement. The final density and map-to-model fit can be seen in Figs. S14 and  
577 S15. Figures were prepared using PyMOL and UCSF Chimera (*Pettersen et al., 2004*).

### 578 Model building and MD simulation of the POPS-bound E2P state

579 We used the structure of Drs2p-Cdc50p in an activated E2-BeF<sub>3</sub><sup>-</sup> (PDB 6ROJ) as starting point for  
580 building a model of the POPS-bound E2P state using molecular dynamics flexible fitting with sec-  
581 ondary structure, cis-peptide and chirality restraints to prevent overfitting (*Trabuco et al., 2008*).  
582 These simulations were performed using an implicit solvent with the scaling factor of the map po-  
583 tential  $g = 0.3$ . The model was refined by manual adjustment in PyMol and energy minimization  
584 in Gromacs. The refined POPS-bound structure was subsequently used to perform a 500 ns-long  
585 all-atom MD simulation using the same settings as in the simulations above.

586 For deposition to the Protein Data Bank (PDB), the structure was subjected to PHENIX Real  
587 Space Refine (*Afonine et al., 2018*) and manually inspected in COOT (*Emsley et al., 2010*). Validation  
588 was performed by MolProbidity (*Chen et al., 2010*) in PHENIX (*Adams et al., 2010*) and relevant  
589 metrics can be found in Table S1.

### 590 Simulation analysis

591 Protein structures were visualized with PyMOL (*Schrödinger, LLC, 2015*) and analysis of simulation  
592 data was conducted using VMD (*Humphrey et al., 1996*) and GROMACS tools (*Abraham et al., 2015*),  
593 and in-house scripts. Averaged density maps of the lipid phosphate group were generated using  
594 GROMAPs (*Briones et al., 2019*) and *g\_lomepro* (*Gapsys et al., 2013*). The interactions between Drs2p  
595 and the bound POPS were analyzed by GetContacts scripts (<https://getcontacts.github.io/>). Error  
596 estimates of the average number of bound PLs were determined with block analysis (*Flyvbjerg and*  
597 *Petersen, 1989*).

## 598 **Data availability**

599 The cryo-EM map is deposited in The Electron Microscopy Data Bank (EMDB) with accession code  
600 EMD-13353, and the structure is available in the Protein Data Bank with PDB ID 7PEM. Input files,  
601 simulations and analysis scripts are available at [https://github.com/KULL-Centre/papers/tree/main/  
602 2020/flippase-wang-et-al-2020](https://github.com/KULL-Centre/papers/tree/main/2020/flippase-wang-et-al-2020).

## 603 **Acknowledgments**

604 We thank Long Li and Kazuhiro Abe for providing the coordinates of Dnf1 and ATP11C. Y.W., J.A.L.,  
605 M.T., F.K. P.N. and K.L.-L. were supported by the BRAINSTRUC structural biology initiative from the  
606 Lundbeck Foundation (R155-2015-2666). Y.W. was also supported by the HPC-Europa3 Transna-  
607 tional Access programme and start-up funds from Zhejiang University. V.G. was supported by the  
608 BioExcel CoE (<http://www.bioexcel.eu>), a project funded by the European Union (Contract H2020-  
609 INFRAEDI-02-2018-823830). We acknowledge access to computational resources from the Danish  
610 National Supercomputer for Life Sciences (Computerome), the ROBUST Resource for Biomolecular  
611 Simulations (supported by the Novo Nordisk Foundation) and the HPC-Europa3 HLRS HPC center.

## 612 **References**

- 613 **Abraham MJ**, Murtola T, Schulz R, Páll S, Smith JC, Hess B, Lindahl E. GROMACS: High performance molecular  
614 simulations through multi-level parallelism from laptops to supercomputers. *SoftwareX*. 2015; 1:19–25.
- 615 **Adams PD**, Afonine PV, Bunkóczi G, Chen VB, Davis IW, Echols N, Headd JJ, Hung LW, Kapral GJ, Grosse-Kunstleve  
616 RW, et al. PHENIX: a comprehensive Python-based system for macromolecular structure solution. *Acta  
617 Crystallographica Section D: Biological Crystallography*. 2010; 66(2):213–221.
- 618 **Afonine PV**, Poon BK, Read RJ, Sobolev OV, Terwilliger TC, Urzhumtsev A, Adams PD. Real-space refinement  
619 in PHENIX for cryo-EM and crystallography. *Acta Crystallographica Section D: Structural Biology*. 2018;  
620 74(6):531–544.
- 621 **Albers RW**. Biochemical Aspects of Active Transport. *Annual Review of Biochemistry*. 1967 jun; 36(1):727–756.
- 622 **Aldeghi M**, de Groot BL, Gapsys V. Accurate Calculation of Free Energy Changes upon Amino Acid Mutation.  
623 In: *Methods in Molecular Biology*, vol. 1851 Humana Press Inc.; 2019.p. 19–47.
- 624 **Andersen JP**, Vestergaard AL, Mikkelsen SA, Mogensen LS, Chalal M, Molday RS. P4-ATPases as Phospholipid  
625 Flippases—Structure, Function, and Enigmas. *Frontiers in Physiology*. 2016 jul; 7:275.
- 626 **Ansell TB**, Curran L, Horrell MR, Pipatpolkai T, Letham SC, Song W, Siebold C, Stansfeld PJ, Sansom MS, Corey  
627 RA. Relative Affinities of Protein-Cholesterol Interactions from Equilibrium Molecular Dynamics Simulations.  
628 *bioRxiv*. 2021; .
- 629 **Azouaoui H**, Montigny C, Ash MR, Fijalkowski F, Jacquot A, Grønberg C, López-Marqués RL, Palmgren MG, Gar-  
630 rigos M, Le Maire M, et al. A high-yield co-expression system for the purification of an intact Drs2p-Cdc50p  
631 lipid flippase complex, critically dependent on and stabilized by phosphatidylinositol-4-phosphate. *PLoS One*.  
632 2014; 9(11).
- 633 **Bai L**, Jain BK, You Q, Duan HD, Graham TR, Li H. Structural basis of the P4B ATPase lipid flippase activity.  
634 *bioRxiv*. 2021; .
- 635 **Bai L**, Kovach A, You Q, Hsu HC, Zhao G, Li H. Autoinhibition and activation mechanisms of the eukaryotic lipid  
636 flippase Drs2p-Cdc50p. *Nature communications*. 2019; 10(1):1–10.
- 637 **Bai L**, You Q, Jain BK, Duan HD, Kovach A, Graham TR, Li H. Transport mechanism of P4 ATPase phosphatidyl-  
638 choline flippases. *eLife*. 2020 dec; 9.
- 639 **Baldrige RD**, Graham TR. Identification of residues defining phospholipid flippase substrate specificity of type  
640 IV P-type ATPases. *Proceedings of the National Academy of Sciences*. 2012; 109(6):E290–E298.
- 641 **Baldrige RD**, Graham TR. Two-gate mechanism for phospholipid selection and transport by type IV P-type  
642 ATPases. *Proceedings of the National Academy of Sciences*. 2013; 110(5):E358–E367.
- 643 **Bethel NP**, Grabe M. Atomistic insight into lipid translocation by a TMEM16 scramblase. *Proceedings of the  
644 National Academy of Sciences of the United States of America*. 2016; 113(49):14049–14054.

- 645 **Bonomi M**, Branduardi D, Bussi G, Camilloni C, Provasi D, Raiteri P, Donadio D, Marinelli F, Pietrucci F, Broglia RA,  
646 Parrinello M. PLUMED: A portable plugin for free-energy calculations with molecular dynamics. *Computer*  
647 *Physics Communications*. 2009 oct; 180(10):1961–1972.
- 648 **Briones R**, Blau C, Kutzner C, de Groot BL, Aponte-Santamaría C. GROMa $\rho$ s: A GROMACS-Based Toolset to  
649 Analyze Density Maps Derived from Molecular Dynamics Simulations. *Biophysical Journal*. 2019 jan; 116(1):4–  
650 11.
- 651 **Carafoli E**, Calcium signaling: A tale for all seasons. *National Academy of Sciences*; 2002.
- 652 **Chen VB**, Arendall WB, Headd JJ, Keedy DA, Immormino RM, Kapral GJ, Murray LW, Richardson JS, Richardson  
653 DC. MolProbity: all-atom structure validation for macromolecular crystallography. *Acta Crystallographica*  
654 *Section D: Biological Crystallography*. 2010; 66(1):12–21.
- 655 **Corradi V**, Mendez-Villuendas E, Ingólfsson HI, Gu RX, Siuda I, Melo MN, Moussatova A, DeGagné LJ, Sejdiu BI,  
656 Singh G, Wassenaar TA, Delgado Magner K, Marrink SJ, Tieleman DP. Lipid-Protein Interactions Are Unique  
657 Fingerprints for Membrane Proteins. *ACS Central Science*. 2018 jun; 4(6):709–717.
- 658 **Corradi V**, Sejdiu BI, Mesa-Galoso H, Abdizadeh H, Noskov SY, Marrink SJ, Tieleman DP. Emerging diversity in  
659 lipid-protein interactions. *Chemical reviews*. 2019; 119(9):5775–5848.
- 660 **Crooks GE**. Entropy production fluctuation theorem and the nonequilibrium work relation for free energy  
661 differences. *Physical Review E - Statistical Physics, Plasmas, Fluids, and Related Interdisciplinary Topics*. 1999  
662 sep; 60(3):2721–2726.
- 663 **Das A**, Rui H, Nakamoto R, Roux B. Conformational Transitions and Alternating-Access Mechanism in the Sar-  
664 coplasmic Reticulum Calcium Pump. *Journal of Molecular Biology*. 2017 mar; 429(5):647–666.
- 665 **Daum G**, Tuller G, Nemeč T, Hrastnik C, Balliano G, Cattel L, Milla P, Rocco F, Conzelmann A, Vionnet C, Kelly  
666 DE, Kelly S, Schweizer E, Schüller HJ, Hojad U, Greiner E, Finger K. Systematic analysis of yeast strains with  
667 possible defects in lipid metabolism. *Yeast*. 1999 may; 15(7):601–614.
- 668 **De Jong DH**, Singh G, Bennett WFD, Arnarez C, Wassenaar TA, Schäfer LV, Periole X, Tieleman DP, Marrink SJ.  
669 Improved parameters for the martini coarse-grained protein force field. *Journal of Chemical Theory and*  
670 *Computation*. 2013 jan; 9(1):687–697.
- 671 **Drachmann ND**, Olesen C, Møller JV, Guo Z, Nissen P, Bublitz M. Comparing crystal structures of Ca  
672 <sup>2+</sup>-ATPase in the presence of different lipids. *FEBS Journal*. 2014 sep; 281(18):4249–4262.
- 673 **Duncan AL**, Corey RA, Sansom MSP. Defining how multiple lipid species interact with inward rectifier potassium  
674 (Kir2) channels. *Proceedings of the National Academy of Sciences*. 2020; 117(14):7803–7813.
- 675 **Dyla M**, Kjærgaard M, Poulsen H, Nissen P. Structure and Mechanism of P-Type ATPase Ion Pumps. *Annual*  
676 *Review of Biochemistry*. 2020 jun; 89(1):annurev-biochem-010611-112801.
- 677 **Emsley P**, Lohkamp B, Scott WG, Cowtan K. Features and development of Coot. *Acta Crystallographica Section*  
678 *D: Biological Crystallography*. 2010; 66(4):486–501.
- 679 **Fadok VA**, Voelker DR, Campbell PA, Cohen JJ, Bratton DL, Henson PM. Exposure of phosphatidylserine on  
680 the surface of apoptotic lymphocytes triggers specific recognition and removal by macrophages. *Journal of*  
681 *immunology (Baltimore, Md : 1950)*. 1992 apr; 148(7):2207–16.
- 682 **Falzone ME**, Malvezzi M, Lee BC, Accardi A. Known structures and unknown mechanisms of TMEM16 scram-  
683 blases and channels. *The Journal of General Physiology*. 2018 jul; 150(7):933–947.
- 684 **Flyvbjerg H**, Petersen HG. Error estimates on averages of correlated data. *The Journal of Chemical Physics*.  
685 1989; 91(1):461–466.
- 686 **Gapsys V**, De Groot BL, Briones R. Computational analysis of local membrane properties. *Journal of Computer-*  
687 *Aided Molecular Design*. 2013 oct; 27(10):845–858.
- 688 **Gapsys V**, Michielssens S, Peters JHe, de Groot BL, Leonov H. Calculation of binding free energies. *Methods in*  
689 *molecular biology (Clifton, NJ)*. 2015; 1215:173–209.
- 690 **Gapsys V**, Michielssens S, Seeliger D, De Groot BL. pmx: Automated protein structure and topology generation  
691 for alchemical perturbations. *Journal of Computational Chemistry*. 2015 feb; 36(5):348–354.

- 692 **He Y**, Xu J, Wu X, Li L. Structures of a P4-ATPase lipid flippase in lipid bilayers. *Protein & Cell*. 2020; p. 1–6.
- 693 **Hiraizumi M**, Yamashita K, Nishizawa T, Nureki O. Cryo-EM structures capture the transport cycle of the P4-  
694 ATPase flippase. *Science (New York, NY)*. 2019 aug; p. eaay3353.
- 695 **Huang J**, Rauscher S, Nawrocki G, Ran T, Feig M, De Groot BL, Grubmüller H, MacKerell AD. CHARMM36m: An  
696 improved force field for folded and intrinsically disordered proteins. *Nature Methods*. 2016 dec; 14(1):71–73.
- 697 **Humphrey W**, Dalke A, Schulten K. VMD – Visual Molecular Dynamics. *Journal of Molecular Graphics*. 1996;  
698 14:33–38.
- 699 **Jensen MS**, Costa SR, Duelli AS, Andersen PA, Poulsen LR, Stanchev LD, Gourdon P, Palmgren M, Pomorski TG,  
700 López-Marqués RL. Phospholipid flipping involves a central cavity in P4 ATPases. *Scientific Reports*. 2017;  
701 7(1):17621.
- 702 **Jiang T**, Yu K, Hartzell HC, Tajkhorshid E. Lipids and ions traverse the membrane by the same physical pathway  
703 in the nhTMEM16 scramblase. *eLife*. 2017 sep; 6.
- 704 **Kalienkova V**, Mosina VC, Bryner L, Oostergetel GT, Dutzler R, Paulino C. Stepwise activation mechanism of  
705 the scramblase nhtmem16 revealed by cryo- em. *eLife*. 2019; 8:e44364.
- 706 **Kobayashi T**, Menon AK. Transbilayer lipid asymmetry. *Current Biology*. 2018 apr; 28(8):R386–R391.
- 707 **Lee S**, Uchida Y, Wang J, Matsudaira T, Nakagawa T, Kishimoto T, Mukai K, Inaba T, Kobayashi T, Molday RS, et al.  
708 Transport through recycling endosomes requires EHD 1 recruitment by a phosphatidylserine translocase.  
709 *The EMBO journal*. 2015; 34(5):669–688.
- 710 **Levental KR**, Malmberg E, Symons JL, Fan YY, Chapkin RS, Ernst R, Levental I. Lipidomic and biophysical home-  
711 ostasis of mammalian membranes counteracts dietary lipid perturbations to maintain cellular fitness. *Nature*  
712 *communications*. 2020; 11(1):1–13.
- 713 **Lipp NF**, Gautier R, Magdeleine M, Renard M, Albanèse V, Čopič A, Drin G. An electrostatic switching mechanism  
714 to control the lipid transfer activity of Osh6p. *Nature Communications*. 2019 dec; 10(1):3926.
- 715 **Lyons JA**, Timcenko M, Dieudonné T, Lenoir G, Nissen P, P4-ATPases: how an old dog learnt new tricks —  
716 structure and mechanism of lipid flippases. Elsevier Ltd; 2020.
- 717 **Marrink SJ**, Risselada HJ, Yefimov S, Tieleman DP, De Vries AH. The MARTINI force field: Coarse grained model  
718 for biomolecular simulations. *Journal of Physical Chemistry B*. 2007 jul; 111(27):7812–7824.
- 719 **Menon I**, Huber T, Sanyal S, Banerjee S, Barré P, Canis S, Warren JD, Hwa J, Sakmar TP, Menon AK. Opsin is a  
720 phospholipid flippase. *Current Biology*. 2011 jan; 21(2):149–153.
- 721 **Montigny C**, Lyons J, Champeil P, Nissen P, Lenoir G. On the molecular mechanism of flippase-and scramblase-  
722 mediated phospholipid transport. *Biochimica et Biophysica Acta (BBA)-Molecular and Cell Biology of Lipids*.  
723 2016; 1861(8):767–783.
- 724 **Morra G**, Razavi AM, Pandey K, Weinstein H, Menon AK, Khelashvili G. Mechanisms of lipid scrambling by the  
725 G protein-coupled receptor opsin. *Structure*. 2018; 26(2):356–367.
- 726 **Muller MP**, Jiang T, Sun C, Lihan M, Pant S, Mahinthichaichan P, Trifan A, Tajkhorshid E. Characterization of  
727 lipid–protein interactions and lipid-mediated modulation of membrane protein function through molecular  
728 simulation. *Chemical reviews*. 2019; 119(9):6086–6161.
- 729 **Nakanishi H**, Irie K, Segawa K, Hasegawa K, Fujiyoshi Y, Nagata S, Abe K. Crystal structure of a human plasma  
730 membrane phospholipid flippase. *Journal of Biological Chemistry*. 2020 jun; p. jbc.RA120.014144.
- 731 **Nakanishi H**, Nishizawa T, Segawa K, Nureki O, Fujiyoshi Y, Nagata S, Abe K. Transport Cycle of Plasma Mem-  
732 brane Flippase ATP11C by Cryo-EM. *Cell Reports*. 2020 sep; 32(13):108208.
- 733 **Natarajan P**, Wang J, Hua Z, Graham TR. Drs2p-coupled aminophospholipid translocase activity in yeast Golgi  
734 membranes and relationship to in vivo function. *Proceedings of the National Academy of Sciences of the*  
735 *United States of America*. 2004 jul; 101(29):10614–10619.
- 736 **Obara K**, Miyashita N, Xu C, Toyoshima I, Sugita Y, Inesi G, Toyoshima C. Structural role of countertransport  
737 revealed in Ca<sup>2+</sup> pump crystal structure in the absence of Ca<sup>2+</sup>. *Proceedings of the National Academy of*  
738 *Sciences of the United States of America*. 2005 oct; 102(41):14489–14496.



- 739 **Olsson MHM**, SØndergaard CR, Rostkowski M, Jensen JH. PROPKA3: Consistent treatment of internal and  
740 surface residues in empirical p K a predictions. *Journal of Chemical Theory and Computation*. 2011 feb;  
741 7(2):525–537.
- 742 **Palmgren M**, Østerberg JT, Nintemann SJ, Poulsen LR, López-Marqués RL. Evolution and a revised nomencla-  
743 ture of P4 ATPases, a eukaryotic family of lipid flippases. *Biochimica et Biophysica Acta (BBA)-Biomembranes*.  
744 2019; 1861(6):1135–1151.
- 745 **Palmgren MG**, Nissen P. P-Type ATPases. *Annual Review of Biophysics*. 2011 jun; 40(1):243–266.
- 746 **Pettersen EF**, Goddard TD, Huang CC, Couch GS, Greenblatt DM, Meng EC, Ferrin TE. UCSF Chimera—a visual-  
747 ization system for exploratory research and analysis. *Journal of computational chemistry*. 2004; 25(13):1605–  
748 1612.
- 749 **Pomorski T**, Menon AK, Lipid flippases and their biological functions. Springer; 2006.
- 750 **Post RL**, Hegyvary C, Kume S. Activation by adenosine triphosphate in the phosphorylation kinetics of sodium  
751 and potassium ion transport adenosine triphosphatase. *Journal of Biological Chemistry*. 1972; 247(20):6530–  
752 6540.
- 753 **Punjani A**, Fleet DJ. 3D variability analysis: Resolving continuous flexibility and discrete heterogeneity from  
754 single particle cryo-EM. *Journal of Structural Biology*. 2021; 213(2):107702.
- 755 **Punjani A**, Rubinstein JL, Fleet DJ, Brubaker MA. cryoSPARC: algorithms for rapid unsupervised cryo-EM struc-  
756 ture determination. *Nature methods*. 2017; 14(3):290–296.
- 757 **Punjani A**, Zhang H, Fleet DJ. Non-uniform refinement: adaptive regularization improves single-particle cryo-  
758 EM reconstruction. *Nature methods*. 2020; 17(12):1214–1221.
- 759 **Qi Y**, Ingólfsson HI, Cheng X, Lee J, Marrink SJ, Im W. CHARMM-GUI Martini Maker for Coarse-Grained Simula-  
760 tions with the Martini Force Field. *Journal of Chemical Theory and Computation*. 2015 sep; 11(9):4486–4494.
- 761 **Roland BP**, Graham TR. Directed evolution of a sphingomyelin flippase reveals mechanism of substrate back-  
762 bone discrimination by a P4-ATPase. *Proceedings of the National Academy of Sciences*. 2016; 113(31):E4460–  
763 E4466.
- 764 **Roland BP**, Naito T, Best JT, Arnaiz-Yépez C, Takatsu H, Roger JY, Shin HW, Graham TR. Yeast and human  
765 P4-ATPases transport glycosphingolipids using conserved structural motifs. *Journal of Biological Chemistry*.  
766 2019; 294(6):1794–1806.
- 767 **Saleh N**, Wang Y, Nissen P, Lindorff-Larsen K. Allosteric modulation of the sarcoplasmic reticulum Ca<sup>2+</sup>  
768 ATPase by thapsigargin via decoupling of functional motions. *Physical Chemistry Chemical Physics*. 2019;  
769 21(39):21991–21995.
- 770 **Schrödinger, LLC**. The PyMOL Molecular Graphics System, Version 1.8; 2015.
- 771 **Shirts MR**, Bair E, Hooker G, Pande VS. Equilibrium free energies from nonequilibrium measurements using  
772 maximum-likelihood methods. *Physical Review Letters*. 2003 oct; 91(14):140601.
- 773 **Takatsu H**, Tanaka G, Segawa K, Suzuki J, Nagata S, Nakayama K, Shin HW. Phospholipid flippase activities  
774 and substrate specificities of human type IV P-type ATPases localized to the plasma membrane. *Journal of*  
775 *Biological Chemistry*. 2014; 289(48):33543–33556.
- 776 **Timcenko M**, Dieudonne T, Montigny C, Boesen T, Lyons JA, Lenoir G, Nissen P. Structural basis of substrate-  
777 independent phosphorylation in a P4-ATPase lipid flippase. *Journal of Molecular Biology*. 2021; p. 167062.
- 778 **Timcenko M**, Lyons JA, Janulienė D, Ulstrup JJ, Dieudonné T, Montigny C, Ash MR, Karlsen JL, Boesen T,  
779 Kühlbrandt W, Others. Structure and autoregulation of a P4-ATPase lipid flippase. *Nature*. 2019; p. 1.
- 780 **Toyoshima C**, Iwasawa S, Ogawa H, Hirata A, Tsueda J, Inesi G. Crystal structures of the calcium pump and  
781 sarcolipin in the Mg<sup>2+</sup>-bound E1 state. *Nature*. 2013 mar; 495(7440):260–264.
- 782 **Toyoshima C**, Kanai R, Cornelius F. First crystal structures of Na<sup>+</sup>,K<sup>+</sup>-ATPase: new light on the oldest ion pump.  
783 *Structure (London, England : 1993)*. 2011 dec; 19(12):1732–8.
- 784 **Trabuco LG**, Villa E, Mitra K, Frank J, Schulten K. Flexible Fitting of Atomic Structures into Electron Microscopy  
785 Maps Using Molecular Dynamics. *Structure*. 2008 may; 16(5):673–683.

- 786 **Tribello GA**, Bonomi M, Branduardi D, Camilloni C, Bussi G. PLUMED 2: New feathers for an old bird. *Computer*  
787 *Physics Communications*. 2014 feb; 185(2):604–613.
- 788 **Vanommeslaeghe K**, Hatcher E, Acharya C, Kundu S, Zhong S, Shim J, Darian E, Guvench O, Lopes P, Vorobyov  
789 I, Mackerell AD. CHARMM general force field: A force field for drug-like molecules compatible with the  
790 CHARMM all-atom additive biological force fields. *Journal of Computational Chemistry*. 2009; p. NA–NA.
- 791 **Vestergaard AL**, Coleman JA, Lemmin T, Mikkelsen SA, Molday LL, Vilsen B, Molday RS, Dal Peraro M, Ander-  
792 sen JP. Critical roles of isoleucine-364 and adjacent residues in a hydrophobic gate control of phospholipid  
793 transport by the mammalian P4-ATPase ATP8A2. *Proceedings of the National Academy of Sciences*. 2014;  
794 111(14):E1334–E1343.
